# Supplementary material for: Behavioural and functional evidence revealing the role of RBFOX1 variation in multiple psychiatric disorders and traits
Source: PubMed Central journal article supplement (PMC9734045; doi:10.1038/s41380-022-01722-4), 2022-08-10
Supplement: 41380_2022_1722_MOESM2_ESM.pdf [file 41380_2022_1722_MOESM2_ESM.pdf]

## Supplementary Tables

**Supplementary Table 1.** Description of samples used for analyses of common genetic variants (summary statistics from GWAS meta-analysis).

**Supplementary Table 2.** Common genetic risk variants (SNPs) in *RBFOX1* gene showing suggestive associations with psychiatric conditions (Excel file)

**Supplementary Table 3.** Enrichment of *RBFOX1* target genes among the significant genes associated for each psychiatric condition

**Supplementary Table 4.** CNVs found in *RBFOX1* in patients with psychiatric conditions (Excel file)

**Supplementary Table 5.** CNVs in *RBFOX1* identified in studies including cases and controls, frequencies and burden analyses.

**Supplementary Table 6.** Number of regulatory elements, H3K4me1 and H3K27ac peaks (data from ENCODE), detected in intronic CNVs in patients (Excel file).

**Supplementary Table 7.** Altered expression of *RBOX1* in brain regions of individuals with SCZ or ASD

**Supplementary Table 8.** Sample characteristics and behavioral performance for the Flanker/Go-nogo and face matching task (human imaging genetics sample)

**Supplementary Table 9.** Fear conditioning: Sociodemographic and psychological characteristics of panic disorder patients with C/C, C/T and T/T *RBFOX1* rs6500744 SNP genotypes

**Supplementary Table 10.** Behavioural performance in the fear conditioning task in panic disorder patients

**Supplementary Table 11.** Neural correlates of rs6500744 SNP genotype differences in fear conditioning and extinction

**Supplementary Table 12.** Behavioral avoidance task: Mean heart rate responses (bpm) during phases of anticipation, exposure, and recovery of BAT assessment

**Supplementary Table 13.** Primer pairs used for qPCR

**Supplementary Table 1.** Description of samples used for analyses of common genetic variants (summary statistics from GWAS meta-analysis)

| <b>GWAS</b>                              | <b>Abbreviation</b> | <b>Participants</b>             | <b>Reference</b>                                                         |
|------------------------------------------|---------------------|---------------------------------|--------------------------------------------------------------------------|
| Attention-Deficit Hyperactivity Disorder | ADHD                | 19,099 Ca + 34,194 Co           | Demontis et al., 2019                                                    |
| Aggression                               | AGG                 | 87,485 individuals              | Ip et al., 2019 (Biorxvs)                                                |
| Autism Spectrum Disorder                 | ASD                 | 18,382 Ca + 27,969 Co           | Grove et al., 2019                                                       |
| Anorexia                                 | ANO                 | 16,992 Ca + 55,525 Co           | Watson et al., 2019                                                      |
| Anxiety                                  | ANX                 | 12,655 Ca + 19,255 Co           | Meier et al., 2019                                                       |
| Bipolar Disorder                         | BIP                 | 20,352 Ca + 31,358 Co           | Stahl et al., 2019                                                       |
| Major Depressive Disorder                | MDD                 | 135,458 Ca + 344,901 Co         | Wray et al., 2018                                                        |
| Obsessive-Compulsive Disorder            | OCD-MA              | 1,773 Ca + 6,122 Co + 915 trios | Arnold et al., 2018                                                      |
| Risk tolerance behavior                  | RT                  | 975,353 individuals             | Linner et al., 2019                                                      |
| Schizophrenia                            | SCZ                 | 67,280 Ca + 86,912 Co           | Schizophrenia Working Group of the Psychiatric Genomics Consortium, 2020 |
| Tourette's Syndrome                      | TS                  | 4,819 Ca + 9,488 Co             | Yu et al., 2019                                                          |
| Cross-Disorder meta-analysis             | CD-MA               | 232,964 Ca + 494,162 Co         | Lee et al. 2019                                                          |

Ca = Cases; Co = controls. Summary statistics from these GWAS meta-analyses were obtained from the Psychiatric Genomics Consortium (PGC; <https://www.med.unc.edu/pgc/download-results/>), Integrative Psychiatric Research Consortium (iPSYCH; <https://ipsych.dk/en/research/downloads/>), UK Biobank (<https://www.ukbiobank.ac.uk/>) and 23andMe (<https://research.23andme.com/>) or authors' request.

**Supplementary table 3.** Enrichment of *RBFOX1* target genes among the significant genes associated for each psychiatric condition

|                                                                                   | <b>ADHD</b> | <b>AGG</b> | <b>ANO</b> | <b>ANX</b> | <b>ASD</b> | <b>BIP</b> | <b>MDD</b>   | <b>OCD</b> | <b>RT</b>    | <b>TS</b> | <b>SCZ</b>   | <b>CD</b>    |
|-----------------------------------------------------------------------------------|-------------|------------|------------|------------|------------|------------|--------------|------------|--------------|-----------|--------------|--------------|
| <b>Number of associated genes in the gene-based analysis*</b>                     | 20          | 3          | 41         | 2          | 13         | 1          | 262          | 1          | 279          | 2         | 438          | 266          |
| <b>Number of <i>RBFOX1</i> target genes among the gene-based associated genes</b> | 4           | 1          | 8          | 1          | 1          | 0          | 42           | 0          | 46           | 1         | 60           | 42           |
| <b>p-value of the hypergeometric test</b>                                         | 0.140       | 0.287      | 0.069      | 0.219      | 0.327      | N/A        | <b>0.016</b> | N/A        | <b>0.010</b> | 0.219     | <b>0.042</b> | <b>0.019</b> |

\* Number of genes associated in the GWAS of each psychiatric condition overcoming gene-wide significance (Bonferroni correction;  $p = 20000/0.05 = 2.5E-06$ ). ADHD, attention-deficit and hyperactivity disorder; AGG, childhood aggression; ANO, anorexia nervosa; ANX, anxiety; ASB, antisocial behaviour; ASD, autism spectrum disorder; BP, bipolar disorder; CD, cross-disorder meta-analysis; MDD, major depressive disorder; OCD, obsessive-compulsive disorder; SCZ, schizophrenia; RT, risk tolerance; TS, Tourette syndrome. Total number of genes in the genome: 20000 genes; 2499 *RBFOX1* target genes (Lee et al. 2016).

**Supplementary Table 5.** CNVs in *RBFOX1* identified in studies including cases and controls, frequencies and burden analyses.

| Study (PMID)                                                   | Disorder    | Total number of cases | Total number of controls | Cases with <i>RBFOX1</i> CN gain | Freq. <i>RBFOX1</i> CN gain in cases | Controls with <i>RBFOX1</i> CN gain | Freq. <i>RBFOX1</i> CN gain in controls | Cases with <i>RBFOX1</i> CN loss | Freq. <i>RBFOX1</i> CN loss in cases | Controls with <i>RBFOX1</i> CN loss | Freq. <i>RBFOX1</i> CN loss in controls | Ratio <i>RBFOX1</i> CNVs in cases vs controls | Burden Test all CNVs | Burden Test CN gain | Burden Test CN loss |
|----------------------------------------------------------------|-------------|-----------------------|--------------------------|----------------------------------|--------------------------------------|-------------------------------------|-----------------------------------------|----------------------------------|--------------------------------------|-------------------------------------|-----------------------------------------|-----------------------------------------------|----------------------|---------------------|---------------------|
| Elia et al., 2010 (19546859)                                   | ADHD        | 335                   | 2026                     | 2                                | 0.60%                                | 0                                   | 0.00%                                   | 1                                | 0.30%                                | 0                                   | 0.00%                                   | -                                             | <u>0.004</u>         | 0.151               | <u>0.019</u>        |
| Lionel et al., 2011 (21832240)                                 | ADHD        | 248                   | 2357                     | 0                                | 0.00%                                | 0                                   | 0.00%                                   | 1                                | 0.40%                                | 0                                   | 0.00%                                   | -                                             | 0.096                | -                   | 0.096               |
| Jarik et al., 2014 (23164820)                                  | ADHD        | 489                   | 1285                     | 1                                | 0.20%                                | 8                                   | 0.62%                                   | 3                                | 0.61%                                | 4                                   | 0.31%                                   | 0.9 : 1                                       | 1                    | 1                   | 0.296               |
| <b>TOTAL</b>                                                   | <b>ADHD</b> | <b>1072</b>           | <b>5668</b>              | <b>3</b>                         | <b>0.28%</b>                         | <b>8</b>                            | <b>0.14%</b>                            | <b>5</b>                         | <b>0.47%</b>                         | <b>4</b>                            | <b>0.07%</b>                            | <b>3.5 : 1</b>                                | -                    | -                   | -                   |
| Prasad et al., 2012 (23275889)                                 | ASD         | 676                   | 5139                     | 0                                | 0.00%                                | 0                                   | 0.00%                                   | 3                                | 0.44%                                | 0                                   | 0.00%                                   | -                                             | <u>0.001</u>         | -                   | <u>0.002</u>        |
| Bacchelli et al., 2020 (32081867)                              | ASD         | 128                   | 363                      | 0                                | 0.00%                                | 0                                   | 0.00%                                   | 2                                | 1.56%                                | 2                                   | 0.55%                                   | 2.8 : 1                                       | 0.278                | -                   | 0.287               |
| Sebat et al., 2007 (17363630 ); Martin et al., 2007 (17503474) | ASD         | 195                   | 196                      | 0                                | 0.00%                                | 0                                   | 0.00%                                   | 1                                | 0.51%                                | 0                                   | 0.00%                                   | -                                             | 0.497                | -                   | 0.495               |
| Griswold et al., 2012 (22543975)                               | ASD         | 813                   | 592                      | 0                                | 0.00%                                | 0                                   | 0.00%                                   | 4                                | 0.49%                                | 0                                   | 0.00%                                   | -                                             | 0.108                | -                   | 0.109               |
| Girirajan et al., 2013 (23375656)                              | ASD         | 2588                  | 580                      | 0                                | 0.00%                                | 0                                   | 0.00%                                   | 6                                | 0.23%                                | 0                                   | 0.00%                                   | -                                             | 0.298                | -                   | 0.298               |
| Kushima et al., 2018 (30208311)                                | ASD         | 1108                  | 2095                     | 0                                | 0.00%                                | 0                                   | 0.00%                                   | 2                                | 0.18%                                | 3                                   | 0.14%                                   | 1.3 : 1                                       | 0.552                | -                   | 0.568               |
| Kanduri et al., 2016 (26052927)                                | ASD         | 80                    | 269                      | 1                                | 1.25%                                | 0                                   | 0.00%                                   | 0                                | 0.00%                                | 2                                   | 0.74%                                   | 1.7 : 1                                       | 0.542                | -                   | 1                   |
| Chen et al., 2017 (28931914)                                   | ASD         | 335                   | 1093                     | 1                                | 0.30%                                | 0                                   | 0.00%                                   | 0                                | 0.00%                                | 0                                   | 0.00%                                   | -                                             | 0.231                | 0.234               | -                   |
| <b>TOTAL</b>                                                   | <b>ASD</b>  | <b>5923</b>           | <b>10327</b>             | <b>2</b>                         | <b>0.03%</b>                         | <b>0</b>                            | <b>0.00%</b>                            | <b>18</b>                        | <b>0.30%</b>                         | <b>7</b>                            | <b>0.07%</b>                            | <b>5.0 : 1</b>                                | -                    | -                   | -                   |
| Grozeva et al 2010 (20368508)                                  | BIP         | 1697                  | 2806                     | 2                                | 0.12%                                | 0                                   | 0.00%                                   | 0                                | 0.00%                                | 0                                   | 0.00%                                   | -                                             | 0.142                | 0.150               | -                   |
| <b>TOTAL</b>                                                   | <b>BIP</b>  | <b>1697</b>           | <b>2806</b>              | <b>2</b>                         | <b>0.12%</b>                         | <b>0</b>                            | <b>0.00%</b>                            | <b>0</b>                         | <b>0.00%</b>                         | <b>0</b>                            | <b>0.00%</b>                            | -                                             | -                    | -                   | -                   |

|                                      |                              |              |              |           |              |           |              |           |              |           |              |                |          |          |          |
|--------------------------------------|------------------------------|--------------|--------------|-----------|--------------|-----------|--------------|-----------|--------------|-----------|--------------|----------------|----------|----------|----------|
| Grünblatt et al., 2017<br>(29179725) | OCD                          | 121          | 124          | 0         | 0.00%        | 0         | 0.00%        | 1         | 0.83%        | 0         | 0.00%        | -              | 0.503    | -        | 0.498    |
| <b>TOTAL</b>                         | <b>OCD</b>                   | <b>121</b>   | <b>124</b>   | <b>0</b>  | <b>0.00%</b> | <b>0</b>  | <b>0.00%</b> | <b>1</b>  | <b>0.83%</b> | <b>0</b>  | <b>0.00%</b> | <b>-</b>       | <b>-</b> | <b>-</b> | <b>-</b> |
| Kushima et al., 2018<br>(30208311)   | SCZ                          | 2458         | 2095         | 0         | 0.00%        | 0         | 0.00%        | 6         | 0.24%        | 3         | 0.14%        | 1.7 : 1        | 0.340    | -        | 0.333    |
| Kushima et al., 2017<br>(27240532)   | SCZ                          | 1699         | 824          | 0         | 0.00%        | 0         | 0.00%        | 3         | 0.18%        | 1         | 0.12%        | 1.4 : 1        | 0.610    | -        | 0.607    |
| Costain et al., 2013<br>(23813976)   | SCZ                          | 454          | 416          | 0         | 0.00%        | 0         | 0.00%        | 7         | 1.54%        | 5         | 1.20%        | 1.3 : 1        | 0.444    | -        | 0.452    |
| <b>TOTAL</b>                         | <b>SCZ</b>                   | <b>4611</b>  | <b>3335</b>  | <b>0</b>  | <b>0.00%</b> | <b>0</b>  | <b>0.00%</b> | <b>16</b> | <b>0.35%</b> | <b>9</b>  | <b>0.27%</b> | <b>1.3 : 1</b> | <b>-</b> | <b>-</b> | <b>-</b> |
| Huang et al., 2018<br>(28641109)     | Tourette<br>syndrome         | 2434         | 4093         | 1         | 0.04%        | 1         | 0.02%        | 6         | 0.25%        | 7         | 0.17%        | 1.5 : 1        | 0.304    | 0.601    | 0.344    |
| Fernandez et al., 2012<br>(22169095) | Tourette<br>syndrome         | 460          | 1131         | 1         | 0.22%        | 3         | 0.27%        | 1         | 0.22%        | 2         | 0.18%        | 1.0 : 1        | 1        | 1        | 0.642    |
| McGrath et al., 2015<br>(25062598)   | Tourette<br>syndrome         | 1086         | 1789         | 1         | 0.09%        | 0         | 0.00%        | 0         | 0.00%        | 0         | 0.00%        | 1              | 0.370    | 0.387    | -        |
| <b>TOTAL</b>                         | <b>Tourette<br/>syndrome</b> | <b>3980</b>  | <b>7013</b>  | <b>3</b>  | <b>0.08%</b> | <b>4</b>  | <b>0.06%</b> | <b>7</b>  | <b>0.18%</b> | <b>9</b>  | <b>0.13%</b> | <b>1.4 : 1</b> | <b>-</b> | <b>-</b> | <b>-</b> |
| <b>TOTAL</b>                         | <b>ALL</b>                   | <b>17404</b> | <b>29273</b> | <b>10</b> | <b>0.06%</b> | <b>12</b> | <b>0.04%</b> | <b>47</b> | <b>0.27%</b> | <b>29</b> | <b>0.10%</b> | <b>2.3 : 1</b> | <b>-</b> | <b>-</b> | <b>-</b> |

This table includes only 18 studies out of 34 (from Supplementary Table 4) for which information about CNVs in controls was available. ADHD, attention deficit hyperactivity disorder; ASD, autism spectrum disorder; BIP, bipolar disorder; CN, copy number; CNVs, copy number variants; Freq., frequency; OCD, obsessive-compulsive disorder; PMID, PubMed ID; SCZ, schizophrenia. Burden analysis performed using PLINK v.1.07. Underlined values correspond to p-values <0.05.

**Supplementary Table 7.** Altered expression of *RBOX1* in brain regions of individuals with SCZ or ASD

| Gene Symbol /<br>Transcript symbol | Disorder | FC    | p-value  | FDR          | Probe        | Brain region ( <i>post mortem</i> ) | Study (PMID) or GEO ID            | Sample, cases vs.<br>controls |
|------------------------------------|----------|-------|----------|--------------|--------------|-------------------------------------|-----------------------------------|-------------------------------|
| <i>RBFOX1</i>                      | ASD      | -1.20 | 7.11E-03 | <b>0.068</b> | N/A          | frontal and temporal cortex         | Parikshak et al., 2016 (27919067) | 48 ASD vs. 49 control         |
| <i>RBFOX1</i>                      | ASD      | -1.41 | 2.20E-02 | N/A          | ILMN_1814316 | temporal cortex                     | Schwede et al., 2018 (29859039)   | 15 ASD vs. 16 control         |
| <i>RBFOX1</i>                      | ASD      | -1.40 | 3.12E-02 | N/A          | ILMN_2359168 | temporal cortex                     | Schwede et al., 2018 (29859039)   | 15 ASD vs. 16 control         |
| <i>RBFOX1</i>                      | ASD      | -1.39 | 1.59E-02 | N/A          | ILMN_1731507 | temporal cortex                     | Schwede et al., 2018 (29859039)   | 15 ASD vs. 16 control         |
| <i>RBFOX1</i>                      | ASD      | -1.32 | N/A      | <b>0.043</b> | ILMN_1731507 | prefrontal and temporal cortex      | Schwede et al., 2018 (29859039)   | 15 ASD vs. 16 control         |
| <i>RBFOX1</i>                      | ASD      | -1.10 | 9.07E-04 | <b>0.025</b> | N/A          | frontal and temporal cortex         | Gandal et al., 2018 (30545856)    | 51 ASD vs. 936 control        |
| <i>RBFOX1-002</i>                  | ASD      | -1.14 | 8.69E-06 | <b>0.006</b> | N/A          | frontal and temporal cortex         | Gandal et al., 2018 (30545856)    | 51 ASD vs. 936 control        |
| <i>RBFOX1-017</i>                  | ASD      | 1.17  | 3.06E-02 | 0.369        | N/A          | frontal and temporal cortex         | Gandal et al., 2018 (30545856)    | 51 ASD vs. 936 control        |
| <i>RBFOX1-016</i>                  | ASD      | 1.35  | 2.26E-02 | 0.325        | N/A          | frontal and temporal cortex         | Gandal et al., 2018 (30545856)    | 51 ASD vs. 936 control        |
| <i>RBFOX1-002</i>                  | SCZ      | -1.02 | 1.55E-02 | 0.170        | N/A          | frontal and temporal cortex         | Gandal et al., 2018 (30545856)    | 559 SCZ vs. 936 control       |
| <i>RBFOX1</i>                      | SCZ      | 1.10  | 3.47E-02 | 0.278        | 221217_s_at  | prefrontal cortex                   | GSE21138                          | 30 SCZ vs. 29 control         |
| <i>RBFOX1</i>                      | SCZ      | -1.26 | 4.89E-02 | 0.328        | 1553422_s_at | striatum                            | GSE53987                          | 18 SCZ vs. 18 control         |
| <i>RBFOX1</i>                      | SCZ      | -1.17 | 4.60E-04 | <b>0.094</b> | 221217_s_at  | prefrontal cortex                   | GSE53987                          | 15 SCZ vs. 19 control         |
| <i>RBFOX1</i>                      | SCZ      | -1.18 | 2.38E-02 | 0.129        | 221217_s_at  | hippocampus                         | GSE53987                          | 15 SCZ vs. 18 control         |
| <i>RBFOX1</i>                      | SCZ      | -1.04 | 4.33E-02 | 0.327        | 7993083      | cerebellum                          | GSE35978                          | 44 SCZ vs. 50 control         |
| <i>RBFOX1</i>                      | SCZ      | -1.04 | 4.33E-02 | 0.327        | 7993083      | cerebellum                          | GSE35974                          | 44 SCZ vs. 50 control         |

N/A, data not available; FC, fold change; FDR, False Discovery Rate; SCZ, schizophrenia; ASD, autism spectrum disorder. In bold, overcoming multiple testing corrections at 10% FDR.

**Supplementary Table 8.** Sample characteristics and behavioral performance for the Flanker/Go-nogo and face matching task (human imaging genetics sample)

|                                         | Flanker/Go-Nogo (n=324) |               |                                                                    | Face matching (n=313) |             |                                                                      |
|-----------------------------------------|-------------------------|---------------|--------------------------------------------------------------------|-----------------------|-------------|----------------------------------------------------------------------|
|                                         | C-carrier               | T/T carrier   | Test-statistic                                                     | C-carrier             | T/T carrier | Test-statistic                                                       |
| <i>Demographics</i>                     |                         |               |                                                                    |                       |             |                                                                      |
| Age, mean +/- SD                        | 32,9 ±9,7               | 33,0 ±10,1    | $t(322)=0,100$ ,<br>$p=0,920$                                      | 33,7 ±9,8             | 33,5 ±10,04 | $t(311)=-0,111$ ,<br>$p=0,912$                                       |
| Sex (males/females)                     | 119/134                 | 36/35         | $X^2=0,299$ ,<br>$p=0,584$                                         | 114/129               | 36/34       | $X^2=0,444$ ,<br>$p=0,505$                                           |
| Education (years), mean +/- SD          | 15,4 ±2,4               | 15,1 ±2,6     | $t(322)=-0,960$ ,<br>$p=0,338$                                     | 15,5 ±2,5             | 15,3 ±2,7   | $t(311)=-0,640$ ,<br>$p=0,523$                                       |
| Site (Berlin/Mannheim/Bonn)             | 72/80/101               | 16/24/31      | $X^2=0,989$ ,<br>$p=0,610$                                         | 73/69/101             | 16/24/30    | $X^2=1,643$ ,<br>$p=0,440$                                           |
| Handedness (right/left/both)            | 230/16/6                | 62/8/1        | n/a*                                                               | 220/16/6              | 61/8/1      | n/a*                                                                 |
| <i>fMRI task performance</i>            |                         |               |                                                                    |                       |             |                                                                      |
| Incongruent (% correct), mean ±SD       | 97,85 ±3,76             | 97,36 ±4,14   | $F(1,317)=1,089$ ,<br>$p=0,30^{a,d}$                               |                       |             |                                                                      |
| Congruent (% correct), mean ±SD         | 99,42 ±2,44             | 98,42 ±4,68   | <b><math>F(1,317)=5,74</math></b> ,<br><b><math>p=0,017</math></b> |                       |             |                                                                      |
| Neutral (% correct), mean ±SD           | 99,07 ±3,12             | 98,73 ±4,51   | $F(1,317)=0,54$ ,<br>$p=0,46$                                      |                       |             |                                                                      |
| Nogo (% correct, no response), mean ±SD | 91,65 ±6,4              | 91,55 ±5,75   | $F(1,317)=0,02$ ,<br>$p=0,90$                                      |                       |             |                                                                      |
| Incongruent, RT (ms), mean ±SD          | 632,78 ±117,07          | 623,60 ±96,71 | $F(1,317)=0,62$ ,<br>$p=0,41^{a,b,c}$                              |                       |             |                                                                      |
| Congruent, RT (ms), mean ±SD            | 576,19 ±112,00          | 571,44 ±94,93 | $F(1,317)=0,23$ ,<br>$p=0,63^{a,b,c}$                              |                       |             |                                                                      |
| Neutral, RT (ms), mean ±SD              | 608,33 ±113,65          | 597,40 ±94,94 | $F(1,317)=0,87$ ,<br>$p=0,35^{a,b,c}$                              |                       |             |                                                                      |
| Faces (% correct)                       |                         |               |                                                                    | 98,58 ±3,46           | 98,45 ±3,11 | $F(1,306)=0,02$ ,<br>$p=0,90$                                        |
| Forms (% correct)                       |                         |               |                                                                    | 97,39 ±3,93           | 95,89 ±4,68 | <b><math>F(1,306)=7,04</math></b> ,<br><b><math>p=0,008^b</math></b> |

Type of statistical test for group comparisons: Normally distributed variables → independent t-tests or univariate ANOVAs including genotype and sex (between-subjects factors), and age and site (covariates of no interest), dichotomous variables →  $\chi^2$  test. Besides genotype effects univariate ANOVAs showed significant effects of <sup>a</sup>sex, <sup>b</sup>age, <sup>c</sup>site, <sup>d</sup>genotype x sex interaction. <sup>#</sup>statistical test not possible due to low number of “both” handedness. *Please note:* We controlled all second-level SPM12 analyses for the effects of sex, age, site, and behavioral covariates corresponding to the fMRI contrast of interest (see methods for details). Abbreviations: ms = milliseconds, RT = reaction time, SD = standard deviation.



**Supplementary Table 9.** Fear conditioning: Sociodemographic and psychological characteristics of panic disorder patients with C/C, C/T and T/T RBFox1 rs6500744 SNP genotypes

|                     | C/C (n=15)  | C/T (n=21)  | T/T (n=11)  | F/Chi <sup>2</sup> | Post-hoc tests      |
|---------------------|-------------|-------------|-------------|--------------------|---------------------|
| Age in years        | 40.67±8.00  | 38.14±10.70 | 31.45±9.77  | 2.98               |                     |
| Female gender       | 11 (73%)    | 15 (71%)    | 7 (64%)     | 0.31               |                     |
| Years of education  |             |             |             | 1.05               |                     |
| ≤ 8                 | 1           | 2           | 1           |                    |                     |
| 9 – 11              | 8           | 11          | 4           |                    |                     |
| ≥ 12                | 6           | 8           | 6           |                    |                     |
| Study Center        |             |             |             | 1.20               |                     |
| Center 1            | 4           | 7           | 4           |                    |                     |
| Center 2            | 1           | 1           | 0           |                    |                     |
| Center 3            | 3           | 5           | 2           |                    |                     |
| Center 4            | 7           | 8           | 5           |                    |                     |
| Digit span forward  | 7.60±2.20   | 7.95±1.69   | 7.45±2.77   | 0.23               |                     |
| Digit span backward | 7.00±2.10   | 7.00±2.05   | 7.18±2.04   | 0.03               |                     |
| TMT-A               | 25.60±5.17  | 27.50±9.99  | 21.54±4.12  | 2.22               |                     |
| TMT-B               | 58.27±18.40 | 56.29±18.71 | 54.18±16.41 | 0.16               |                     |
| CGI                 | 5.53±0.74   | 5.43±0.60   | 5.36±0.51   | 0.25               |                     |
| SIGH-A              | 25.67±6.02  | 23.33±4.48  | 24.09±5.67  | 0.86               |                     |
| MI alone            | 2.90±0.91   | 2.34±1.22   | 2.45±0.91   | 1.29               |                     |
| PAS                 | 29.83±7.35  | 24.61±8.62  | 27.18±10.95 | 1.53               |                     |
| ASI                 | 37.00±7.31  | 27.95±9.64  | 29.45±10.02 | 4.63*              | C/C>C/T             |
| BDI-II              | 23.67±9.08  | 14.48±4.91  | 12.91±7.85  | 9.62***            | C/C>C/T,<br>C/C>T/T |

ASI: Anxiety Sensitivity Index; BDI-II: Beck Depression Inventory-II; CGI: Clinical Global Impression; MI: Mobility Inventory; PAS: Panic and Agoraphobia-Scale; SIGH-A: Structured Interview Guide for the Hamilton Anxiety Scale; TMT: Trail Making Test; \*:  $p < 0.05$ ; \*\*\*:  $p < 0.001$

**Supplementary Table 10.** Behavioural performance in the fear conditioning task in panic disorder patients

|                          | C/C (n=19) |      | T/C (n=34) |      | T/T (n=12) |      |
|--------------------------|------------|------|------------|------|------------|------|
|                          | Mean       | SD   | Mean       | SD   | Mean       | SD   |
| <b>Aversiveness US</b>   | 8,00       | 1,15 | 7,91       | 1,74 | 7,08       | 2,99 |
| <b>Fam.: Valence CS+</b> | 3,16       | 0,83 | 3,09       | 1,08 | 3,00       | 0,95 |
| <b>Fam.: Arousal CS+</b> | 2,21       | 0,71 | 2,09       | 1,08 | 2,58       | 1,00 |
| <b>Fam.: Valence CS-</b> | 3,11       | 0,94 | 2,94       | 1,28 | 3,42       | 1,08 |
| <b>Fam.: Arousal CS-</b> | 2,21       | 0,85 | 2,03       | 1,14 | 2,25       | 1,06 |
| <b>Acq.: Valence CS+</b> | 3,05       | 1,08 | 2,94       | 1,18 | 2,92       | 0,90 |
| <b>Acq.: Arousal CS+</b> | 2,37       | 0,90 | 2,21       | 1,25 | 2,25       | 0,97 |
| <b>Acq.: Valence CS-</b> | 3,16       | 1,01 | 3,00       | 1,39 | 3,42       | 1,00 |
| <b>Acq.: Arousal CS-</b> | 2,16       | 1,12 | 1,97       | 1,14 | 2,17       | 1,03 |
| <b>Ext.: Valence CS+</b> | 3,53       | 0,77 | 2,94       | 1,15 | 3,25       | 0,87 |
| <b>Ext.: Arousal CS+</b> | 1,95       | 0,91 | 1,94       | 1,07 | 1,92       | 1,38 |
| <b>Ext.: Valence CS-</b> | 3,42       | 0,96 | 3,06       | 1,25 | 3,50       | 1,09 |
| <b>Ext.: Arousal CS-</b> | 2,16       | 1,07 | 1,91       | 1,19 | 1,92       | 1,24 |

Acq.: acquisition phase; CS: conditioned stimulus; Ext.: extinction phase; Fam.: familiarization phase; US: unconditioned stimulus.

**Supplementary Table 11.** Neural correlates of rs6500744 SNP genotype differences in fear conditioning and extinction

| Anatomical region                                                                                                             | Cluster extension                                            | BA            | Coordinates |     |     | t-value | no. voxels |
|-------------------------------------------------------------------------------------------------------------------------------|--------------------------------------------------------------|---------------|-------------|-----|-----|---------|------------|
|                                                                                                                               |                                                              |               | x           | y   | z   |         |            |
| <b><i>C/C &gt; T/T in simple fear conditioning (Contrast: CS+ in late familiarization &lt; CS+ in late acquisition)</i></b>   |                                                              |               |             |     |     |         |            |
| Right MFG                                                                                                                     | Bilateral dmPFC, dACC, SFG, right IFG                        | 9,10,24,32,46 | 44          | 50  | 20  | 4.80    | 3931       |
| Right MTG                                                                                                                     | Right STG, insula, precentral gyrus, rolandic operculum, SMG | 21,22,39,41   | 34          | -16 | 42  | 4.34    | 6093       |
| Occipital visual cortex                                                                                                       |                                                              | 17,18         | -36         | -88 | 12  | 4.29    | 791        |
| Left postcentral gyrus                                                                                                        | Left STG, MTG, IPL                                           | 3,39,41,42    | -50         | -18 | 52  | 4.18    | 2604       |
| Left Insula                                                                                                                   | Left thalamus, MTG, putamen                                  |               | 8           | -30 | -14 | 4.17    | 2219       |
| Right lingual gyrus                                                                                                           | Right calcarine gyrus, fusiform gyrus                        | 17,18,19      | 18          | -84 | 4   | 4.14    | 1539       |
| Precuneus                                                                                                                     | PCC, paracentral lobule                                      | 31            | -8          | -48 | 42  | 3.71    | 1150       |
| Left precentral gyrus                                                                                                         |                                                              | 9             | -44         | 14  | 32  | 3.60    | 306        |
| Left Amygdala (ROI)                                                                                                           |                                                              |               | -26         | -2  | -14 | 2.83    | 20         |
| <b><i>C/C &gt; T/T in differential fear conditioning (Contrast: CS+ in late acquisition &gt; CS- in late acquisition)</i></b> |                                                              |               |             |     |     |         |            |
| PCC                                                                                                                           | Precuneus                                                    | 7,31          | -14         | -50 | 40  | 4.32    | 1436       |
| Right angular gyurs                                                                                                           | Right STG, MTG                                               | 22,40         | 48          | -58 | 40  | 3.90    | 852        |
| dmPFC                                                                                                                         | SMA                                                          | 8             | 10          | 24  | 48  | 3.74    | 298        |
| Left angular gyrus                                                                                                            | Left IPL                                                     | 40            | -52         | -62 | 44  | 3.69    | 464        |
| Lingual gyrus                                                                                                                 | Calcarine gyrus                                              | 18            | 10          | -78 | 0   | 3.49    | 478        |
| STG                                                                                                                           |                                                              | 22            | -48         | -42 | 14  | 3.27    | 185        |
| Cuneus                                                                                                                        |                                                              | 19            | 16          | -80 | 30  | 3.04    | 157        |
| <b><i>C/C &gt; T/T in fear extinction (Contrast: CS+ in late acquisition &gt; CS+ in late extinction)</i></b>                 |                                                              |               |             |     |     |         |            |
| dmPFC                                                                                                                         | dACC, SFG,                                                   | 6,8,9,32      | 4           | 66  | 14  | 4.47    | 3207       |
| Precentral gyrus                                                                                                              |                                                              | 6             | -36         | -2  | 44  | 3.55    | 261        |
| Right IFG                                                                                                                     | MFG                                                          | 45            | 38          | 22  | 24  | 3.30    | 637        |

Participants are patients with panic disorder. Neuroimage Coordinates are listed in MNI space. ROI: region of interest analysis was performed within bilateral amygdala. Significance level: uncorrected  $p < 0.005$ , cluster with at least 141 voxels. BA: brodmann areas; dACC; Dorsal anterior cingulate cortex; dmPFC: dorsomedial prefrontal cortex; IFG: Inferior frontal gyrus; IPL: Inferior parietal lobule; MFG: Middle frontal gyrus; MTG: Middle temporal gyrus; PCC; Posterior cingulate cortex; SFG: Superior frontal gyrus; SMA: Supplementary motor cortex; STG: Superior temporal gyrus.

**Supplementary Table 12.** Behavioral avoidance task: Mean heart rate responses (bpm) during phases of anticipation, exposure, and recovery of BAT assessment, respectively, and heart rate increase from last minute of anticipation phase to first minute of exposure phase ( $\Delta$ bpm) in panic disorder patients with C/C, C/T and T/T RBFox1 rs6500744 SNP genotypes showing no avoidance behavior and reporting at least moderate fear during the task.

|                                      | <b>C/C (n=34)</b> | <b>C/T (n=54)</b> | <b>T/T (n=18)</b> |
|--------------------------------------|-------------------|-------------------|-------------------|
| Anticipation                         | 80.39±12.52       | 78.09±11.89       | 76.23±4.44        |
| Exposure                             | 81.45±12.86       | 79.37±12.97       | 77.44±5.24        |
| Recovery                             | 77.35±10.28       | 76.32±11.05       | 77.19±5.25        |
| Initial response during BAT exposure | 5.42±11.44        | 2.25±9.06         | -0.66±5.82        |

BAT: behavioral avoidance task; bpm: beats per minute.

**Supplementary Table 13.** Primer pairs used for qPCR

| Name (Target) <sup>a</sup>                                                               | Sequences <sup>b</sup>                                  | Target transcripts <sup>c</sup>                                                                                                                                                | Std. curve <sup>d</sup>                                |
|------------------------------------------------------------------------------------------|---------------------------------------------------------|--------------------------------------------------------------------------------------------------------------------------------------------------------------------------------|--------------------------------------------------------|
| <i>Actb</i> (Mus musculus actin, beta)                                                   | F: GCTTCTTTGCAGCTCCTTCG<br>R: ATGCCGGAGCCGTTGTC         | 60-156 of NM_007393.5                                                                                                                                                          | y = -4.04x+35.3<br>r <sup>2</sup> = 0.997<br>E = 0.767 |
| <i>B2m</i> (Mus musculus beta-2 microglobulin)                                           | F: ACTGACCGGCCTGTATGCTA<br>R: CAATGTGAGGCGGGTGGAA       | 93-217 of NM_009735.3                                                                                                                                                          | y = -3.29x+36.9<br>r <sup>2</sup> = 0.955<br>E = 1.013 |
| <i>Hprt</i> (Mus musculus hypoxanthine guanine phosphoribosyl transferase)               | F: TGCTGACCTGCTGGATTACA<br>R: TTTATGTCCCCCGTTGACTGA     | 371-490 of NM_013556.2                                                                                                                                                         | y = -3.91x+37.6<br>r <sup>2</sup> = 0.996<br>E = 0.803 |
| <i>Rbfox1</i> (Mus musculus RNA binding protein, fox-1 homolog (C. elegans))             | F: AGACTGTCAACCCCTACACCA<br>R: CATAGAAGTCGGGGCTGTAGAC   | Amplification of all 9 verified and 44 predicted transcripts with 75 bp amplicon size                                                                                          | y = -4.06x+38.0<br>r <sup>2</sup> = 0.970<br>E = 0.764 |
| <i>Rbfox2</i> (Mus musculus RNA binding protein, fox-1 homolog (C. elegans))             | F: GGGATGCAGAACGAGCCAC<br>R: CTGAACCATTGCGTCAGGAG       | Amplification of 3/12 verified transcripts (NM_053104.6, NM_175387.3, NM_001110827.2) and 12/43 predicted transcripts with 102 bp amplicon size                                | y = -5.09x+41.5<br>r <sup>2</sup> = 0.959<br>E = 0.572 |
| <i>Rbfox3</i> (Mus musculus RNA binding protein, fox-1 homolog (C. elegans))             | F: ATCGTAGAGGGACGGAAAATTGA<br>R: GTTCCCAGGCTTCTTATTGGTC | Amplification of 5/6 verified transcripts (NM_001039167.1, NM_001039168.1, NM_001024931.2, NM_001285436.1, NM_001285438.1) 22/22 predicted transcript with 72 bp amplicon size | y = -4.32x+38.7<br>r <sup>2</sup> = 0.991<br>E = 0.703 |
| <i>Sdha</i> (Mus musculus succinate dehydrogenase complex, subunit A, flavoprotein (Fp)) | F: GGACAGGCCACTCACTCTTAC<br>R: CACAGTGCAATGACACCACG     | 616-745 of NM_023281.1                                                                                                                                                         | y = -3.30x+36.7<br>r <sup>2</sup> = 0.940<br>E = 1.01  |
| <i>Syn1</i> (Mus musculus synapsin I)                                                    | F: TGCCCAGATGGTTCGACTAC<br>R: CACAGGGTATGTTGTGCTGC      | 816-927 of NM_013680.4 and NM_001110780.1                                                                                                                                      | y = -4.83x+41.8<br>r <sup>2</sup> = 0.950<br>E = 0.611 |

<sup>a</sup> Name of the primer pair/target gene and full name of the target gene (protein names that differ from the gene name are written in square brackets).

<sup>b</sup> Nucleotide sequences of the forward (F) and reverse (R) primers.

<sup>c</sup> Region of the target gene amplified by the primer pair.

<sup>d</sup> Linear function and coefficient of determination (r<sup>2</sup>) of the standard curve and efficiency (E) of the primer calculated from the slope.

**Supplementary Figures:**

**Supplementary Figure 1.** Copy-number variations in *RBFOX1* in controls and patients with other psychiatric disorders than ASD and SCZ.

**Supplementary Figure 2.** Distribution of non-coding copy number variants (CNVs) in *RBFOX1* in patients with psychiatric conditions and overlap with transcriptional regulatory elements.

**Supplementary Figure 3.** *RBFOX1* expression in different tissues from human samples.

**Supplementary Figure 4.** *RBFOX1* gene expression in different human brain regions.

**Supplementary Figure 5.** Effects of neuron-specific deletion of *Rbfox1* on body weight, gene expression, and behaviour in mice.

**Supplementary Figure 6.** Schematic representation of the cohorts and experimental schedule used in the mouse experiments.

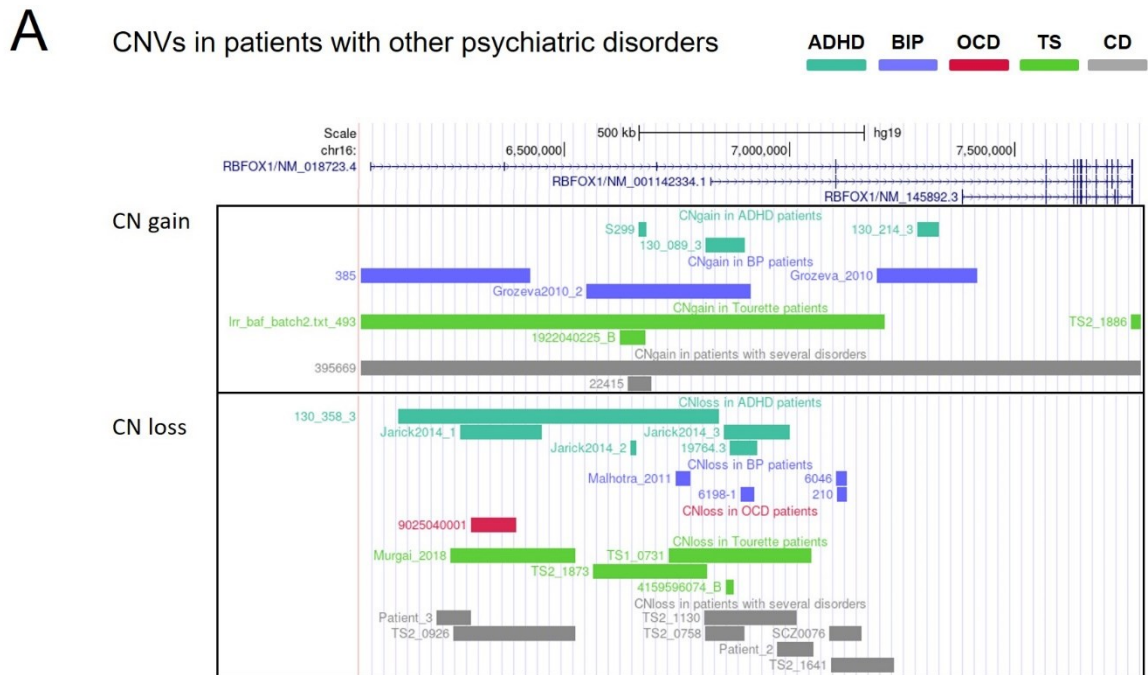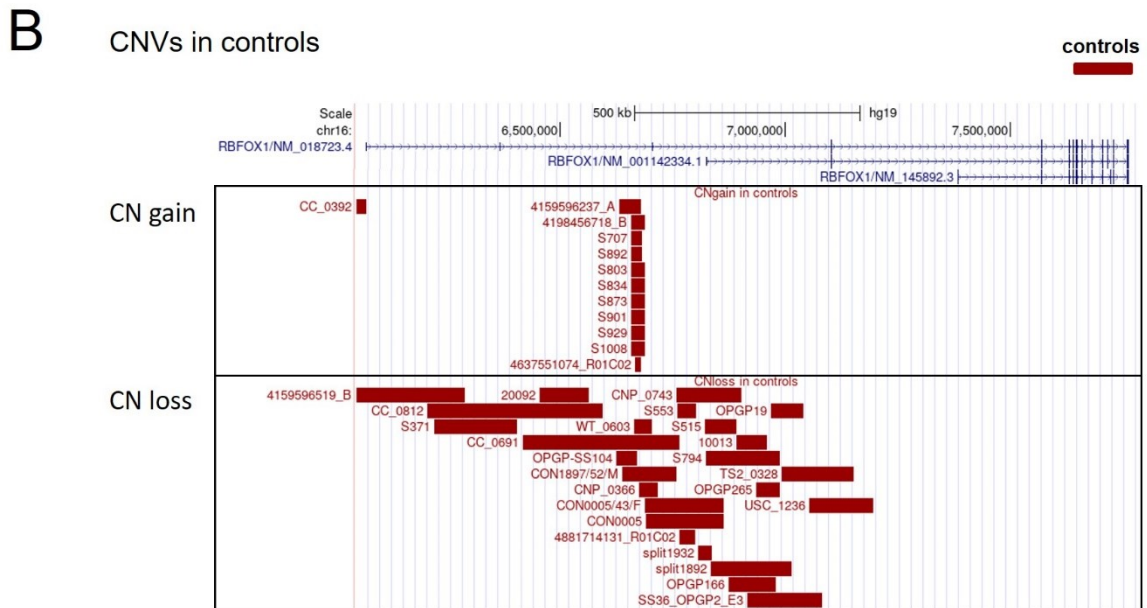

**Supplementary Figure 1.** Copy number variants in *RBFOX1* identified in A) patients with other psychiatric disorders, B) controls described in the 18 papers used for the burden test analysis.

## A Peak regions enriched in gains and losses

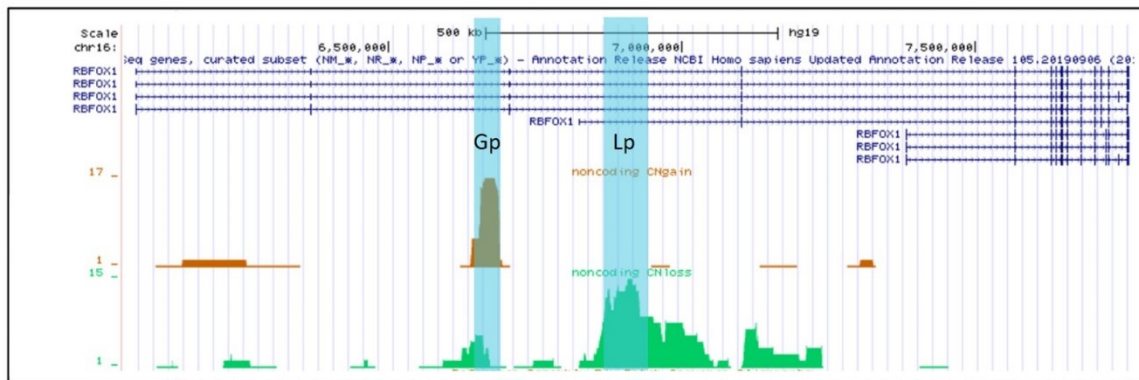

## B Gain peak

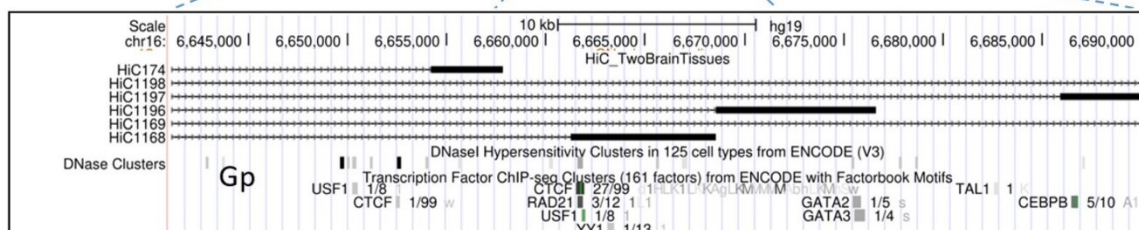

## C Loss peak

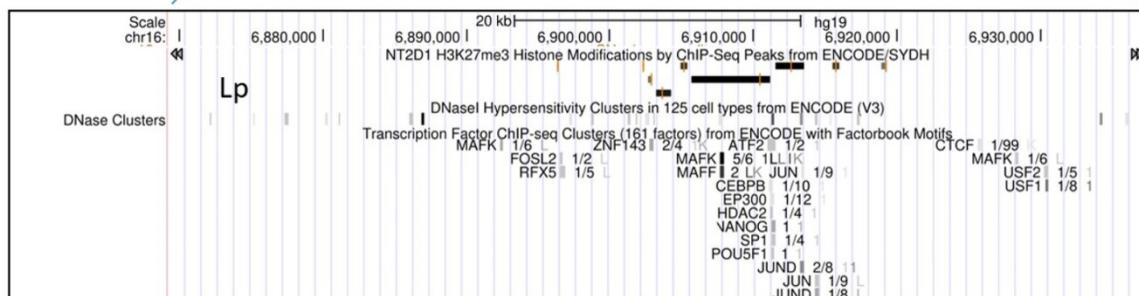

**Supplementary Figure 2.** Distribution of non-coding copy number variants (CNVs) in *RBFOX1* in patients with psychiatric conditions and overlap with transcriptional regulatory elements. a) Distribution of non-coding CNVs in *RBFOX1* in patients. Peak regions enriched in CNVs are highlighted in blue. Gp, gain peak, corresponds to the region where more CN gains are concentrated; Lp, loss peak, corresponds to the region where more CN losses are concentrated. b) Distribution of ChIP-seq signatures from ENCODE present in the Lp region. c) Distribution of ChIP-seq signatures from ENCODE present in the Gp region.



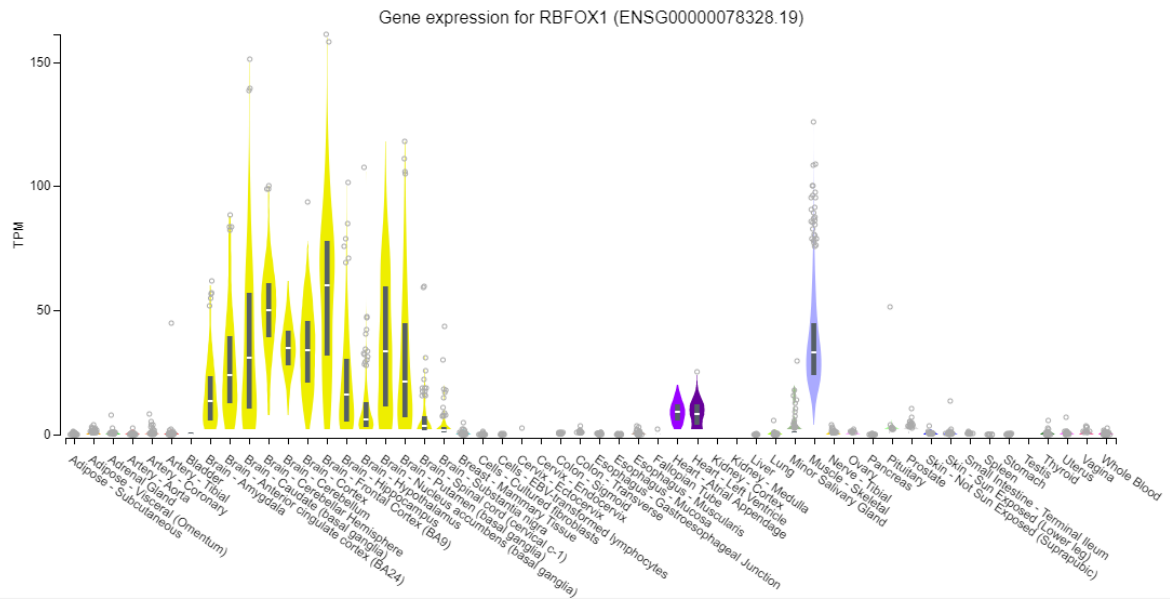

**Supplementary Figure 3.** *RBFOX1* expression in different tissues from human samples (GTEx database).

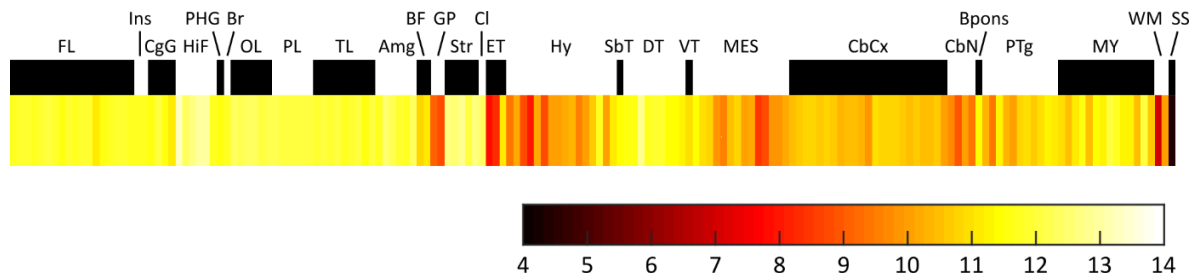

**Supplementary Figure 4.** *RBFOX1* gene expression in different brain regions of the human brain (FL, frontal lobe; Ins, Insula; CgG, Cingulate Gyrus; HiF, Hippocampal Formation; PHG, parahippocampal gyrus; Br, piriform cortex; OL, occipital lobe; PL, parietal lobe; TL, temporal lobe; Amg, amygdala; BF, basal forebrain; GP, globus pallidus; Str, striatum; Cl, claustrum; ET, epithalamus; Hy, hypothalamus; SbT, subthalamus; DT, dorsal thalamus; VT, ventral thalamus; MES, mesencephalon; CbCx, cerebellar cortex; CbN, cerebellar nuclei; Bpons, basal part of pons; PTg, pontine tegmentum; MY, myelencephalon; WM, white matter; SS, sulci & spaces). Data was obtained from the Allen Human Brain Atlas (<http://human.brain-map.org/>) (Hawrylycz et al. 2012) and depicted as the average from two different probes.

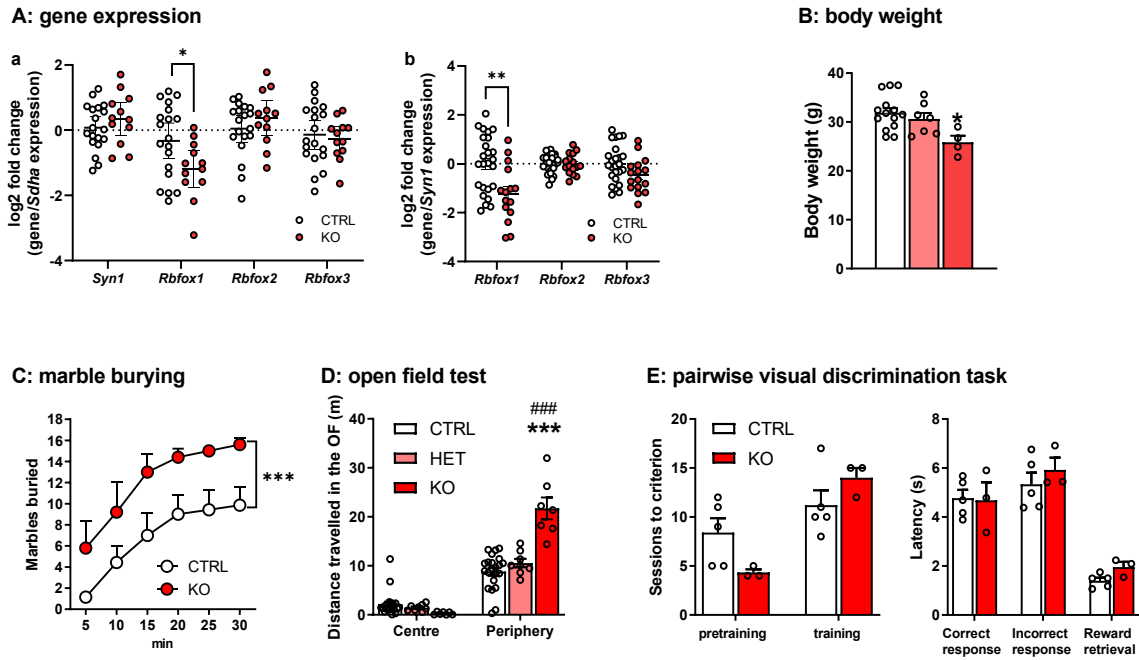

**Supplementary Figure 5.** Effects of neuron-specific deletion of *Rbfox1* on body weight, gene expression, and behaviour in mice. **A**, neuron-specific deletion of *Rbfox1* resulted in selective brain-wide *Rbfox1* downregulation relative to the housekeeping gene *Sdha* (a), and even more pronounced downregulation relative to the neuronal marker *Synapsin1* (*Syn1*) (b), while *Rbfox2* and *Rbfox3* expression remained unaltered (n=12-18 tissue samples per group; \* - p<0.05; \*\* - p<0.01 vs CTRL; two-tailed t-tests). **B**, *Rbfox1*-KO had lower body weight than CTRL and HET at 10-14 weeks (n=4-14 per group; \* - p<0.05 vs CTRL; one-way ANOVA; Fisher's LSD test). **C**, *Rbfox1*-KO buried more marbles than CTRL in the marble-burying test (n=5-7 per group; \* - p<0.05 vs CTRL; Friedman's test), but this appeared to be due to excessive digging and displacement of bedding rather than anxiety (Supplementary Video 1). **D**, *Rbfox1*-KO displayed marked thigmotaxis in the open field test compared to CTRL and HET, moving mainly in the peripheral area of the open field (n=7-21 per group; \*\*\* - p<0.001 vs CTRL; ### - p<0.001 vs HET; two-way ANOVA; Bonferroni post hoc test). **E**, there were no differences between CTRL and KO in the acquisition of the touchscreen pairwise discrimination task (as measured by the number of sessions completed before reaching the criterion); additionally, similar response latencies to stimuli and reward retrieval suggest that CTRL and KO did not differ in motivation to perform the task (n=4-5 per group; two-tailed t-tests). Data is presented as means ± SEM.

## Timeline of mouse behavioural experiments

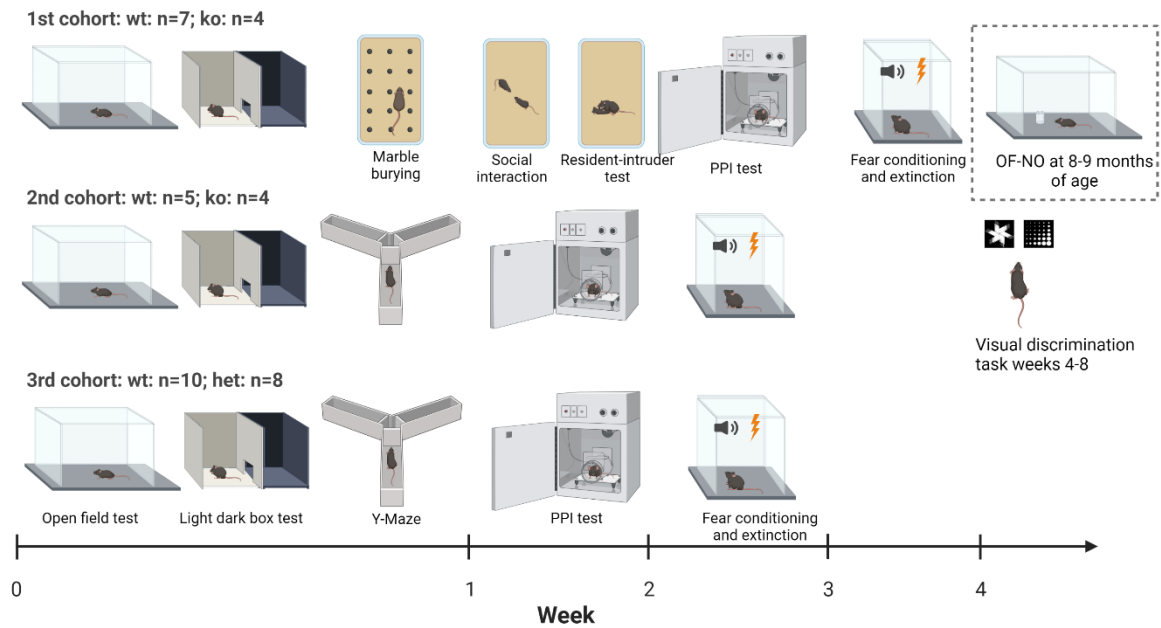

**Supplementary Figure 6.** Schematic representation of the mouse behavioural experiments. OF/NO – open field/novel object investigation test; PPI – prepulse inhibition test. Created with Biorender.com.
